# Supplementary material for: Cool Temperature Enhances Growth, Ferulic Acid and Flavonoid Biosynthesis While Inhibiting Polysaccharide Biosynthesis in Angelica sinensis
Source: MDPI journal article supplement (doi:10.3390/molecules27010320), 2022-01-05
Supplement: s1 [file s1]

## Figure supplementary materials

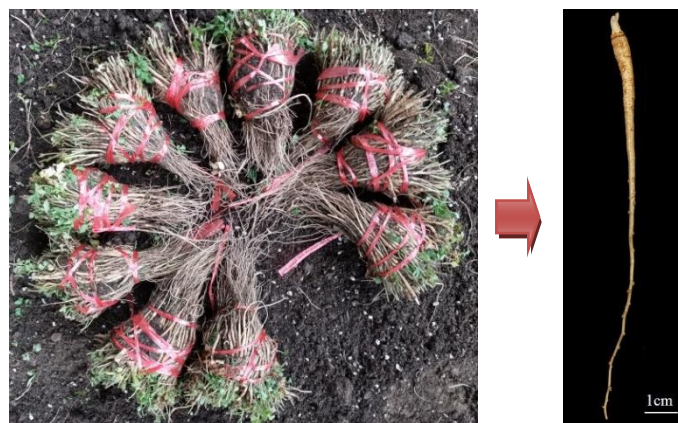

**Fig. S1** Seedlings of *A. sinensis* (cultivar Mingui 1) with root-tip diameter 0.4-0.5 cm.

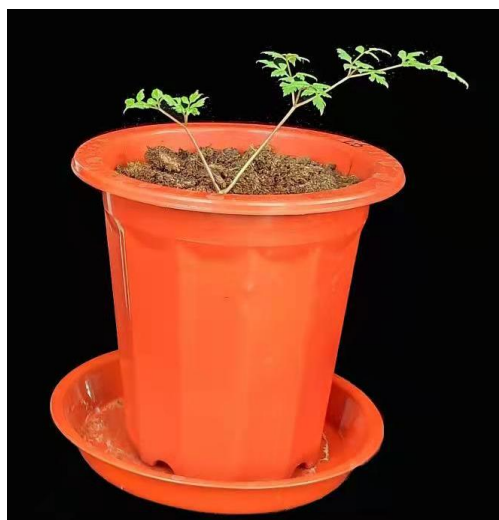

**Fig. S2** Plantlets contained two leaves after 15 days.

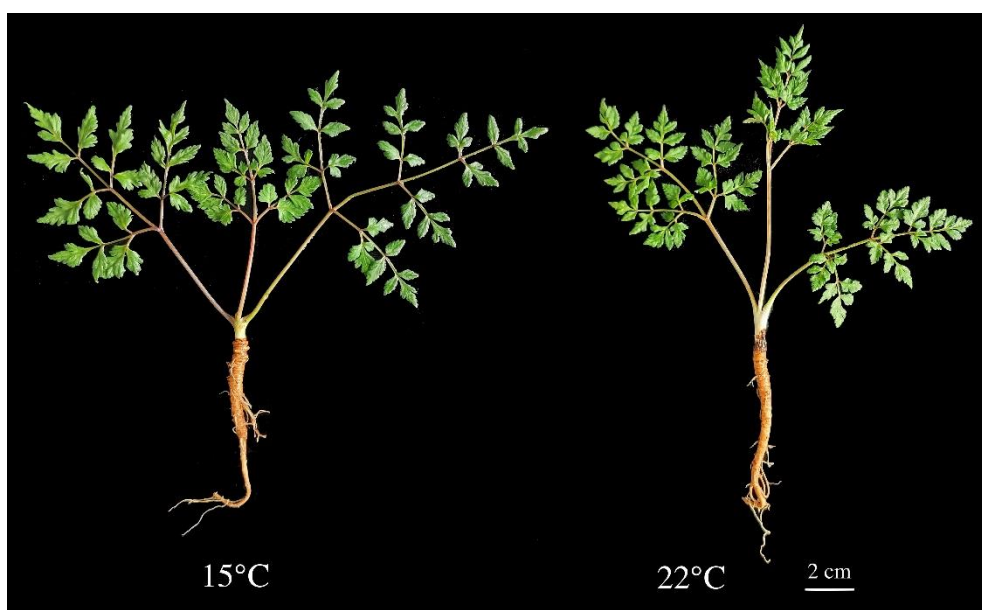

**Fig. S3** Plants treated at 15 and 22°C after 30 days.

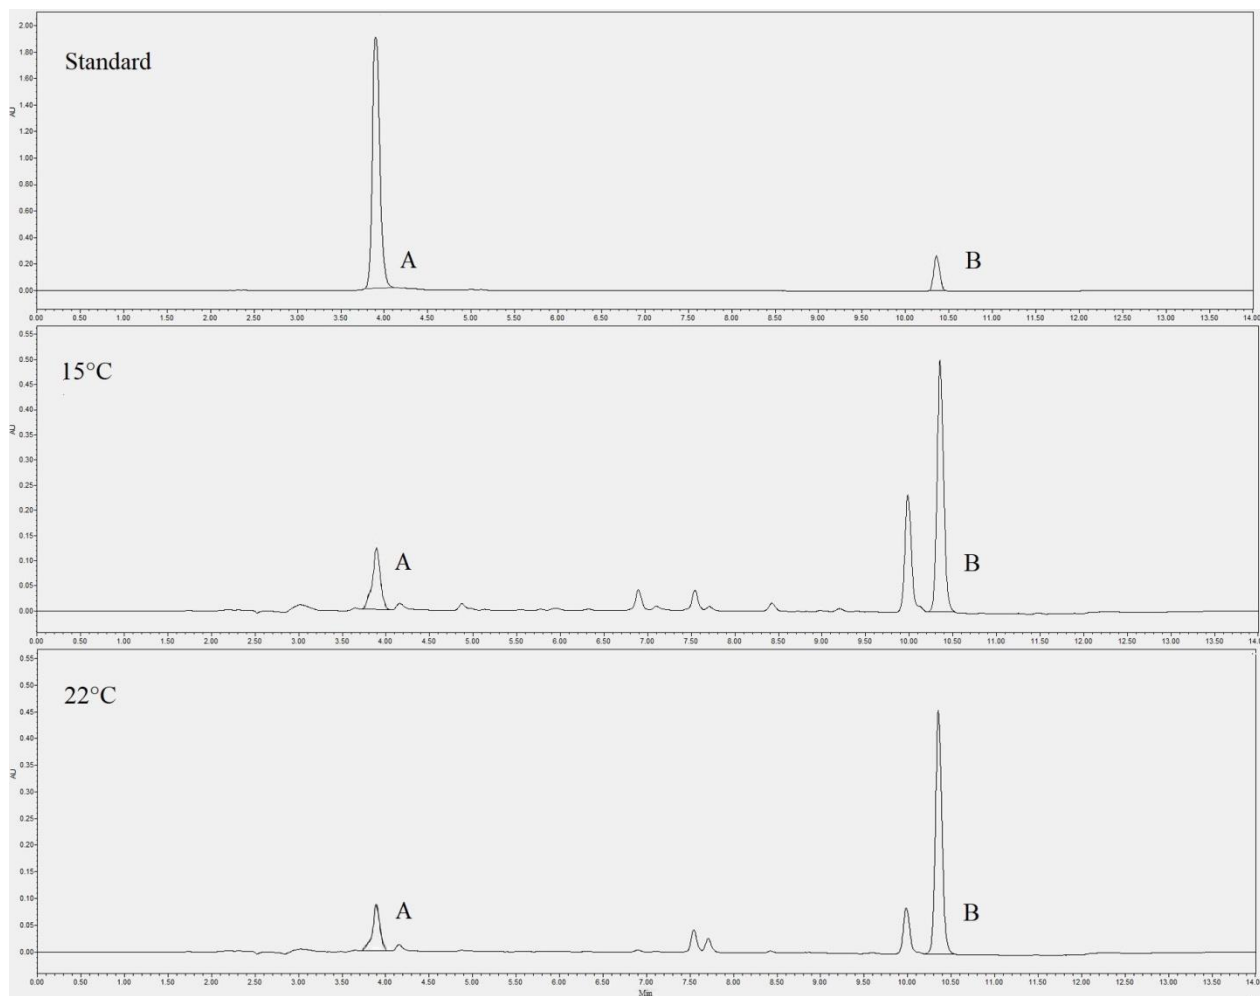

**Fig. S4** Representative HPLC chromatograms of standard and samples at 15°C and 22°C. A and B represent ferulic acid and ligustilide.
